# Supplementary material for: A subtelomeric region affects telomerase-negative replicative senescence in Saccharomyces cerevisiae
Source: PubMed Central journal article supplement (PMC6372760; doi:10.1038/s41598-018-38000-9), 2019-02-12
Supplement: 41598_2018_38000_MOESM1_ESM.pdf [file 41598_2018_38000_MOESM1_ESM.pdf]

## Supplementary Information for:

### A subtelomeric region affects telomerase-negative replicative senescence in *Saccharomyces cerevisiae*

Pascale Jolivet<sup>#</sup>, Kamar Serhal<sup>#</sup>, Marco Graf, Stephan Eberhard, Zhou Xu, Brian Luke and Maria Teresa Teixeira<sup>\*</sup>

#### Supplementary Table 1:

##### Yeast strains used in this study

All strains are in the W303 background. The strains were constructed for this work, except those labelled with \*, which were described previously<sup>1-3</sup>.

| Strain | Genotype                                                                                                                                                                                                                                                                                       |
|--------|------------------------------------------------------------------------------------------------------------------------------------------------------------------------------------------------------------------------------------------------------------------------------------------------|
| yT136* | Mata/ $\alpha$ cir <sup>o</sup> ura3-1/ura3-1 trp1-1/trp1-1 his3-11,15/his3-11,15 can1-100/can1-100 ade2-1/ade2-1 leu2-3,112::Gal-FLP1-LEU2/leu2-3,112::Gal-FLP1-LEU2 rad5-535/rad5-535 tlc1::PrnNat/TLC1 telVIII::FRT-URA3-FRT-tel/telVIII::FRT-URA3-FRT-tel                                  |
| yT138* | Mata/ $\alpha$ cir <sup>o</sup> ura3-1/ura3-1 trp1-1/trp1-1 his3-11,15/his3-11,15 can1-100/can1-100 ade2-1/ade2-1 leu2-3,112::Gal-FLP1-LEU2/leu2-3,112::Gal-FLP1-LEU2 rad5-535/rad5-535 tlc1::PrnNat/TLC1 telVIII::FRT-URA3-[tel600]-FRT-tel/telVIII::FRT-URA3-[tel600]-FRT-tel                |
| yT347* | Mata/ $\alpha$ cir <sup>o</sup> ura3-1/ura3-1 trp1-1/trp1-1 his3-11,15/his3-11,15 can1-100/can1-100 ade2-1/ade2-1 leu2-3,112::Gal-Flp1-Leu2/leu2-3,112::Gal-Flp1-Leu2 tlc1::PrnNat/TLC1 telVIII::FRT-URA3-FRT/telVIII::FRT-URA3-FRT-tel pCen-ARS-TRP1-TLC1 rad51::HIS3/RAD51                   |
| yT348* | Mata/ $\alpha$ cir <sup>o</sup> ura3-1/ura3-1 trp1-1/trp1-1 his3-11,15/his3-11,15 can1-100/can1-100 ade2-1/ade2-1 leu2-3,112::Gal-Flp1-Leu2/leu2-3,112::Gal-Flp1-Leu2 tlc1::PrnNat/TLC1 telVIII::FRT-URA3-[tel600]-FRT/telVIII::FRT-URA3-[tel600]-FRT-tel pCen-ARS-TRP1-TLC1 rad51::HIS3/RAD51 |
| yT502* | Mata/ $\alpha$ cir <sup>o</sup> ura3-1/ura3-1 trp1-1/trp1-1 his3-11,15/his3-11,15 can1-100/can1-100 ade2-1/ade2-1 leu2-3,112::Gal-FLP1-LEU2/leu2-3,112::Gal-FLP1-LEU2 rad5-535/rad5-535 tlc1::PrnNat/TLC1 telVIR::FRT-URA3-FRT-tel/telVIR::FRT-URA3-FRT-tel                                    |
| yT503* | Mata/ $\alpha$ cir <sup>o</sup> ura3-1/ura3-1 trp1-1/trp1-1 his3-11,15/his3-11,15 can1-100/can1-100 ade2-1/ade2-1 leu2-3,112::Gal-FLP1-LEU2/leu2-3,112::Gal-FLP1-LEU2 rad5-535/rad5-535 tlc1::PrnNat/TLC1 telVIR::FRT-URA3-[tel600]-FRT-tel/telVIR::FRT-URA3-[tel600]-FRT-tel                  |
| yT674  | Mata cir <sup>o</sup> ura3-1 trp1-1 his3-11,15 can1-100 ade2-1 leu2-3,112::Gal-FLP1-LEU2 rad5-535 TLC1 telVIR::FRT-URA3-FRT-tel rad51::HIS3                                                                                                                                                    |
| yT675  | Mata cir <sup>o</sup> ura3-1 trp1-1 his3-11,15 can1-100 ade2-1 leu2-3,112::Gal-FLP1-LEU2 rad5-535 TLC1 telVIR::FRT-URA3-[tel600]-FRT-tel rad51::HIS3                                                                                                                                           |
| yT839  | Mata/ $\alpha$ cir <sup>o</sup> ura3-1/ura3-1 trp1-1/trp1-1 leu2-3,112/leu2-3,112 his3-11,15/his3-11,15 ade2-1/ade2-1, can1-100/can1-100 TLC1/tlc1::KanMX6 TELVIII/TELVIII                                                                                                                     |
| yT840  | Mata/ $\alpha$ cir <sup>o</sup> ura3-1/ura3-1 trp1-1/trp1-1 leu2-3,112/leu2-3,112 his3-11,15/his3-11,15 ade2-1/ade2-1, can1-100/can1-100 TLC1/tlc1::KanMX6 telVIII-adh4::URA3-tel/telVIII-adh4::URA3-tel                                                                                       |
| yT1136 | Mata/ $\alpha$ cir <sup>o</sup> ura3-1/ura3-1 trp1-1/trp1-1 leu2-3,112/leu2-3,112 his3-11,15/his3-11,15 ade2-1/ade2-1, can1-100/can1-100 TLC1/tlc1::KanMX6 TELVIII/TELVIII                                                                                                                     |
| yT1137 | Mata/ $\alpha$ cir <sup>o</sup> ura3-1/ura3-1 trp1-1/trp1-1 leu2-3,112/leu2-3,112 his3-11,15/his3-11,15 ade2-1/ade2-1, can1-100/can1-100 TLC1/tlc1::KanMX6 telVIII-yps5::URA3-tel/telVIII-yps5::URA3-tel                                                                                       |
| yT1376 | Mata/ $\alpha$ cir <sup>o</sup> ura3-1/ura3-1 trp1-1/trp1-1 leu2-3,112/leu2-3,112 his3-11,15/his3-11,15 ade2-1/ade2-1, can1-100/can1-100 TLC1/tlc1::KanMX6 TELVIII/telVIII 8-14kb::HIS                                                                                                         |

yT1377 Mata/α cir<sup>o</sup> ura3-1/ura3-1 trp1-1/trp1-1 leu2-3,112/leu2-3,112 his3-11,15/his3-11,15 ade2-1/ade2-1, can1-100/can1-100 TLC1/tlc1::KanMX6 TELVIL/TELVIL

yT1378 Mata/α cir<sup>o</sup> ura3-1/ura3-1 trp1-1/trp1-1 leu2-3,112/leu2-3,112 his3-11,15/his3-11,15 ade2-1/ade2-1, can1-100/can1-100 TLC1/tlc1::KanMX6 telVIL 8-14kb::HIS/telVIL 8-14kb::HIS

## Supplementary Table 2:

Oligonucleotides used in this study (matching sequences of strain W303 - Sanger Institute database).

| Name   | Use               | Sequence 5'-3'                                                                    |
|--------|-------------------|-----------------------------------------------------------------------------------|
| oT323  | RAD51 F1          | TTCTTCTATCTTCCGTAGTTTCCATATACTAGTAGTTGAGTGAGCGACAcggatccccgggtaa<br>taa           |
| oT324  | RAD51 R1          | GGATGGAAATGAAGATAAAAATGTACGGAACGCAACCTAAGAAAAGAGGgaattcgagctcgtt<br>taaac         |
| 169    | Telomere-PCR      | CGGGATCCGGGGGGGGGGGGGGGGGGGG                                                      |
| oT182  | Telomere-PCR Y'   | TACATGAGGGCTATTTAGGGCTATTTAGGG                                                    |
| oT156  | Telomere-PCR VIII | TTGTTGAAAGCCATACCTGCC                                                             |
| oT531  | Telomere-PCR VIR  | AGGACTGGGTCATGGGGCGC                                                              |
| oT794  | qPCR ACTIN F      | CCCAGGTATTGCCGAAAGAATGC                                                           |
| oT795  | qPCR ACTIN R      | TTTGTGGAAGGTAGTCAAAGAAGCC                                                         |
| oT831  | qPCR FZF1 F       | TGATAGCACTACGGCACAACCC                                                            |
| oT832  | qPCR FZF1 R       | TTTGCACCGTTATCCGACCAG                                                             |
| oT1605 | qPCR VEL1 F       | AGGGCCTACATGGACCTCATTG                                                            |
| oT1606 | qPCR VEL1 R       | AGCATCACCAGCGCTTTCAGTC                                                            |
| oT1607 | qPCR MNT2 F       | TCCAGTGGTTGCACAGGTTCTG                                                            |
| oT1608 | qPCR MNT2 R       | CCAGGCCGCTTCCAATGATG                                                              |
| oT1609 | qPCR ADH4 F       | ACTCCAGCTGTTGCTGTCAACG                                                            |
| oT1610 | qPCR ADH4 R       | GCAGTCAAAGCAGGTGGCAAAC                                                            |
| oT1611 | qPCR YGL258W-A F  | GGGAGCATCTTATTCGGTGCAGTC                                                          |
| oT1612 | qPCR YGL258W-A R  | ACGCATAGGATGTGTGCAGAGC                                                            |
| oT1656 | qPCR BBR6 F       | AGACAGCCTGATGGCATACTTGC                                                           |
| oT1657 | qPCR BBR6 R       | AGCATCTTGCAGGATGTTACCTTC                                                          |
| oT1096 | YPS5 F1           | TGGGACAGGGTTTTGCATCGTTCTGTCTTGTCTCTTTTTTCATTGGTTGATCAGTTGTTcg<br>gatccccgggtaataa |
| oT1099 | MNT2 R1           | CGCATGAGTGTGTCAAATCCGCAGTGACAGGACAAAAGTAGCCCAATAGTATTTATCG<br>gaattcgagctcgttaaac |

## Supplementary Table 3:

p-values for the spot assays determined by pairwise Wilcoxon rank sum test with a false discovery rate adjustment

| Experiment | Genotype 1 | Genotype 2 | Passage | p- value |
|------------|------------|------------|---------|----------|
|------------|------------|------------|---------|----------|

|        |            |            |   |          |
|--------|------------|------------|---|----------|
| Fig 2c | Control 7L | VST 7L     | 1 | 0,0255   |
|        | Control 7L | VST 7L     | 2 | 0,00005  |
|        | Control 7L | VST 7L     | 3 | 0,08568  |
|        | Control 6R | VST 6R     | 1 | 0,0006   |
|        | Control 6R | VST 6R     | 2 | 0,0078   |
|        | Control 6R | VST 6R     | 3 | 0,0098   |
|        | Control 7L | Control 6R | 1 | 0,00042  |
|        | Control 7L | Control 6R | 2 | 0,00036  |
|        | Control 7L | Control 6R | 3 | 0,000008 |
|        | VST 7L     | VST 6R     | 1 | 0,5935   |
|        | VST 7L     | VST 6R     | 2 | 0,000008 |
|        | VST 7L     | VST 6R     | 3 | 0,000007 |

|        |              |              |   |        |
|--------|--------------|--------------|---|--------|
| Fig 3a | VST 7L RAD51 | VST 7L rad51 | 1 | 0,0081 |
|        | VST 7L RAD51 | VST 7L rad51 | 2 | 0,0069 |
|        | VST 7L RAD51 | VST 7L rad51 | 3 | 0,1550 |
|        | VST 6R RAD51 | VST 6R rad51 | 1 | 0,0317 |
|        | VST 6R RAD51 | VST 6R rad51 | 2 | 0,0317 |
|        | VST 6R RAD51 | VST 6R rad51 | 3 | 0,4206 |
|        | VST 7L RAD51 | VST 6R RAD51 | 1 | 0,755  |
|        | VST 7L RAD51 | VST 6R RAD51 | 2 | 0,0732 |
|        | VST 7L RAD51 | VST 6R RAD51 | 3 | 0,005  |
|        | VST 7L rad51 | VST 6R rad51 | 1 | 0,329  |
|        | VST 7L rad51 | VST 6R rad51 | 2 | 0,0389 |
|        | VST 7L rad51 | VST 6R rad51 | 3 | 0,2207 |

|        |                  |                  |   |        |
|--------|------------------|------------------|---|--------|
| Fig 4b | TLC1+ 7L WT      | TLC1+ 7L Δ 15 kb | 1 | 0,2344 |
|        | TLC1+ 7L WT      | TLC1+ 7L Δ 15 kb | 2 | 0,0498 |
|        | TLC1+ 7L WT      | TLC1+ 7L Δ 15 kb | 3 | 0,1948 |
|        | TLC1- 7L WT      | TLC1- 7L Δ 15 kb | 1 | 0,0281 |
|        | TLC1- 7L WT      | TLC1- 7L Δ 15 kb | 2 | 0,0029 |
|        | TLC1- 7L WT      | TLC1- 7L Δ 15 kb | 3 | 0,0065 |
|        | TLC1+ 7L WT      | TLC1- 7L WT      | 1 | 0,8784 |
|        | TLC1+ 7L WT      | TLC1- 7L WT      | 2 | 0,0003 |
|        | TLC1+ 7L WT      | TLC1- 7L WT      | 3 | 0,0001 |
|        | TLC1+ 7L Δ 15 kb | TLC1- 7L Δ 15 kb | 1 | 0,0649 |
|        | TLC1+ 7L Δ 15 kb | TLC1- 7L Δ 15 kb | 2 | 0,0001 |
|        | TLC1+ 7L Δ 15 kb | TLC1- 7L Δ 15 kb | 3 | 0,0001 |

|        |                 |                 |   |        |
|--------|-----------------|-----------------|---|--------|
| Fig 4d | TLC1+ 7L WT     | TLC1+ 7L Δ 8 kb | 1 | 0,4418 |
|        | TLC1+ 7L WT     | TLC1+ 7L Δ 8 kb | 2 | 0,0498 |
|        | TLC1+ 7L WT     | TLC1+ 7L Δ 8 kb | 3 | 0,0379 |
|        | TLC1- 7L WT     | TLC1- 7L Δ 8 kb | 1 | 0,7209 |
|        | TLC1- 7L WT     | TLC1- 7L Δ 8 kb | 2 | 0,8784 |
|        | TLC1- 7L WT     | TLC1- 7L Δ 8 kb | 3 | 0,7209 |
|        | TLC1+ 7L WT     | TLC1- 7L WT     | 1 | 0,0029 |
|        | TLC1+ 7L WT     | TLC1- 7L WT     | 2 | 0,0001 |
|        | TLC1+ 7L WT     | TLC1- 7L WT     | 3 | 0,0001 |
|        | TLC1+ 7L Δ 8 kb | TLC1- 7L Δ 8 kb | 1 | 0,0046 |
|        | TLC1+ 7L Δ 8 kb | TLC1- 7L Δ 8 kb | 2 | 0,0001 |
|        | TLC1+ 7L Δ 8 kb | TLC1- 7L Δ 8 kb | 3 | 0,0001 |

|           |                 |                  |   |        |
|-----------|-----------------|------------------|---|--------|
| Fig 4b-4d | TLC1- 7L Δ 8 kb | TLC1- 7L Δ 15 kb | 1 | 0,0029 |
|           | TLC1- 7L Δ 8 kb | TLC1- 7L Δ 15 kb | 2 | 0,0069 |
|           | TLC1- 7L Δ 8 kb | TLC1- 7L Δ 15 kb | 3 | 0,0133 |

|                         |                           |                             |                         |        |        |
|-------------------------|---------------------------|-----------------------------|-------------------------|--------|--------|
| Fig 4f                  | TLC1+ 7L WT               | TLC1+ 7L $\Delta$ 8-14 kb   | 1                       | 0,0649 |        |
|                         | TLC1+ 7L WT               | TLC1+ 7L $\Delta$ 8-14 kb   | 2                       | 0,0147 |        |
|                         | TLC1+ 7L WT               | TLC1+ 7L $\Delta$ 8-14 kb   | 3                       | 0,3282 |        |
|                         | TLC1- 7L WT               | TLC1- 7L $\Delta$ 8-14 kb   | 1                       | 0,8784 |        |
|                         | TLC1- 7L WT               | TLC1- 7L $\Delta$ 8-14 kb   | 2                       | 0,8784 |        |
|                         | TLC1- 7L WT               | TLC1- 7L $\Delta$ 8-14 kb   | 3                       | 0,2344 |        |
|                         | TLC1+ 7L WT               | TLC1- 7L WT                 | 1                       | 0,0104 |        |
|                         | TLC1+ 7L WT               | TLC1- 7L WT                 | 2                       | 0,0001 |        |
|                         | TLC1+ 7L WT               | TLC1- 7L WT                 | 3                       | 0,0001 |        |
|                         | TLC1+ 7L $\Delta$ 8-14 kb | TLC1- 7L $\Delta$ 8-14 kb   | 1                       | 0,0498 |        |
|                         | TLC1+ 7L $\Delta$ 8-14 kb | TLC1- 7L $\Delta$ 8-14 kb   | 2                       | 0,0001 |        |
|                         | TLC1+ 7L $\Delta$ 8-14 kb | TLC1- 7L $\Delta$ 8-14 kb   | 3                       | 0,0001 |        |
|                         | Fig 5c                    | TLC1- 7L WT                 | TLC1- 7L $\Delta$ 15 kb | 1      | 0,2786 |
|                         |                           | TLC1- 7L WT                 | TLC1- 7L $\Delta$ 15 kb | 2      | 0,2786 |
| TLC1- 7L WT             |                           | TLC1- 7L $\Delta$ 15 kb     | 3                       | 0,0010 |        |
| TLC1- 7L WT             |                           | TLC1- 7L WT NAM             | 1                       | 0,0379 |        |
| TLC1- 7L WT             |                           | TLC1- 7L WT NAM             | 2                       | 0,0498 |        |
| TLC1- 7L WT             |                           | TLC1- 7L WT NAM             | 3                       | 0,0379 |        |
| TLC1- 7L $\Delta$ 15 kb |                           | TLC1- 7L $\Delta$ 15 kb NAM | 1                       | 0,1303 |        |
| TLC1- 7L $\Delta$ 15 kb |                           | TLC1- 7L $\Delta$ 15 kb NAM | 2                       | 0,2344 |        |
| TLC1- 7L $\Delta$ 15 kb |                           | TLC1- 7L $\Delta$ 15 kb NAM | 3                       | 0,0270 |        |
| TLC1- 7L WT NAM         |                           | TLC1- 7L $\Delta$ 15 kb NAM | 1                       | 0,3282 |        |
| TLC1- 7L WT NAM         |                           | TLC1- 7L $\Delta$ 15 kb NAM | 2                       | 0,1605 |        |
| TLC1- 7L WT NAM         |                           | TLC1- 7L $\Delta$ 15 kb NAM | 3                       | 0,0104 |        |
| Fig 4b*-4f              |                           | TLC1- 7L $\Delta$ 8-14 kb   | TLC1- 7L $\Delta$ 15 kb | 1      | 0,0093 |
|                         | TLC1- 7L $\Delta$ 8-14 kb | TLC1- 7L $\Delta$ 15 kb     | 2                       | 0,0093 |        |
|                         | TLC1- 7L $\Delta$ 8-14 kb | TLC1- 7L $\Delta$ 15 kb     | 3                       | 0,0012 |        |

\**tlc1- $\Delta$  7L- $\Delta$  15kb* clones as shown in Figure 4b were respotted at the same time than *tlc1- $\Delta$  7L- $\Delta$  8-14 kb* clones shown in Figure 4b to allow pairwise comparison.

# Supplementary Figure 1

**a**

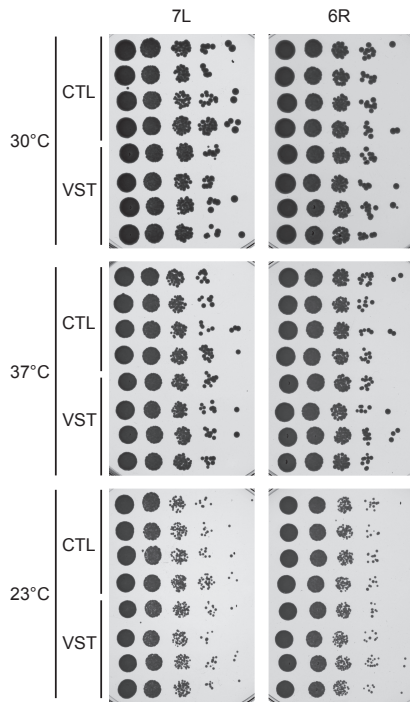

**d**

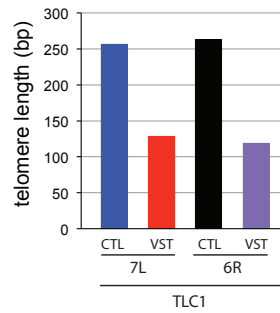

**b**

telomere 7L in 7L-CTL cells - Glucose

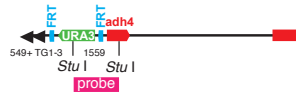

telomere 7L in 7L-CTL cells - Galactose

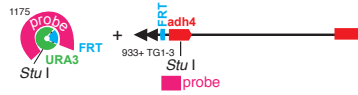

telomere 7L in 7L-VST cells - Glucose

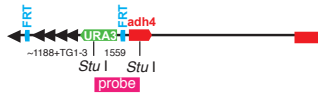

telomere 7L in 7L-VST cells - Galactose

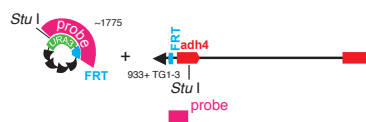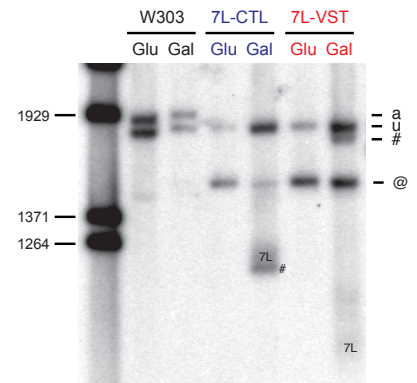

**c**

telomere 6R in 6R-CTL cells - Glucose

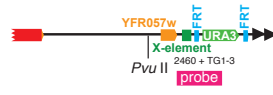

telomere 6R in 6R-CTL cells - Galactose

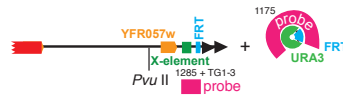

telomere 6R in 6R-VST cells - Glucose

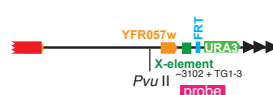

telomere 6R in 6R-VST cells - Galactose

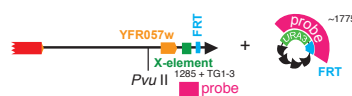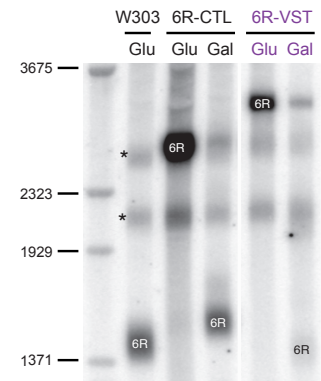

e

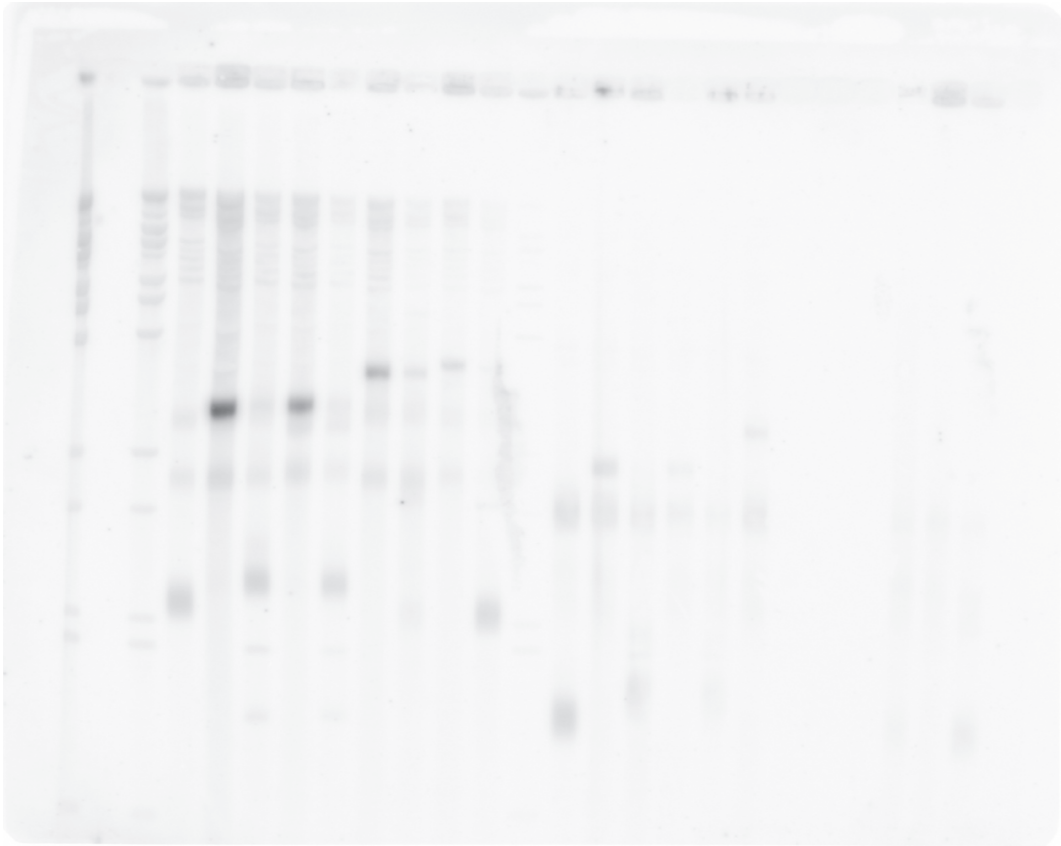

f

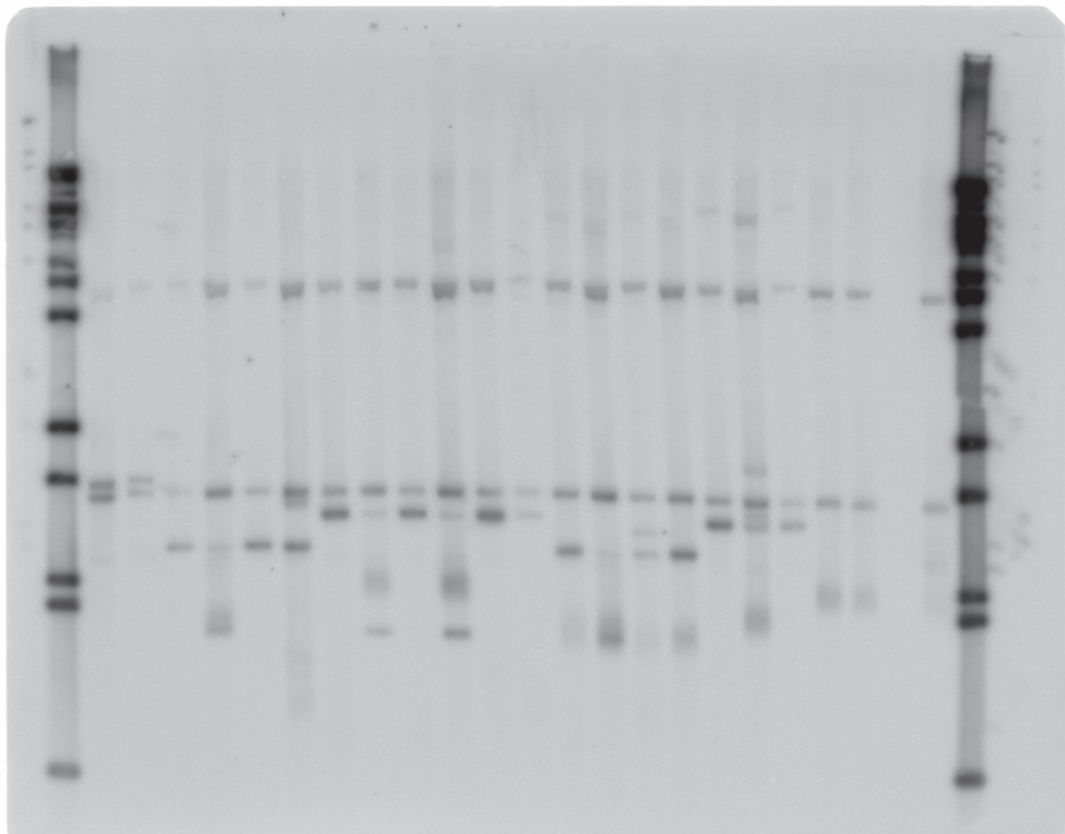

(a) Serial spot assay of telomerase-positive cells containing the constructs shown in Figure 1B, C, E, F (7L-CTL: lev187; 7L-VST: lev220; 6R-CTL: yT361; 6R-VST: yT362<sup>2,4</sup>). 10-fold serial dilutions of 4 independent clones were spotted on minimal media and then incubated for 2 days at 30°C, 37°C or 23°C. (b-c) Schematic representation of Telomere Restricted Fragment (TRF) analysis and corresponding Southern blots of telomere 7L (b) and 6R (c) of strains labeled as in (a) and Figure 1. Southern blot in (c) is the exact same Figure than Figure S2G from<sup>4</sup>, where these set of strains were first described. Cells were cultivated for four hours in a rich medium containing either glucose or galactose, to induce shortening, followed by DNA extraction and DNA restrictive digestion by *Stu* I (B) or *Pvu* II (c). u: internal *ADH4* locus; a: internal *ura3* locus ; #: excised URA3-containing circle (linearized); @: fragment of the 7L when excision did not occur; \*: corresponds to cross hybridization to other X elements in the genome; 7L: 7L TRF; 6R: 6R TRF. (d) Telomere lengths of 7L and 6R telomeres in CTL or VST strains estimated from by Southern Blot after *FLP1* induction before telomerase removal shown in B-C. (e-f) Original images of the Southern blots shown in (b-c). Lanes shown in b) correspond to lanes 3-4 and 9-10 of (e). Lanes shown in (c) correspond to lanes 1-7 of (f).

## References

- 1 Abdallah, P. *et al.* A two-step model for senescence triggered by a single critically short telomere. *Nat Cell Biol* **11**, 988-993 (2009).
- 2 Marcand, S., Brevet, V. & Gilson, E. Progressive cis-inhibition of telomerase upon telomere elongation. *EMBO J.* **18**, 3509-3519 (1999).
- 3 Fallet, E. *et al.* Length-dependent processing of telomeres in the absence of telomerase. *Nucleic Acids Res* **42**, 3648-3665 (2014).
- 4 Graf, M. *et al.* Telomere Length Determines TERRA and R-Loop Regulation through the Cell Cycle. *Cell* **170**, 72-85 (2017).
